# Supplementary material
Source: MDPI journal article supplement (https://www.mdpi.com/2076-3417/9/13/2619)
Supplement: s1 [file s1]

# Waterproof Aerated Bricks from Stone Powder Waste through Nano-TiO<sub>2</sub> Structured Hydrophobic Surface Modification

Tao Li <sup>1</sup>, Shaopeng Zeng <sup>2</sup>, Yaxiong Ji <sup>3</sup>, Boxu Shen <sup>3</sup>, Zhuangmiao Wang <sup>4</sup>, Hong Zhong <sup>3,\*</sup> and Shifeng Wang <sup>5,\*</sup>

## Supplementary Materials

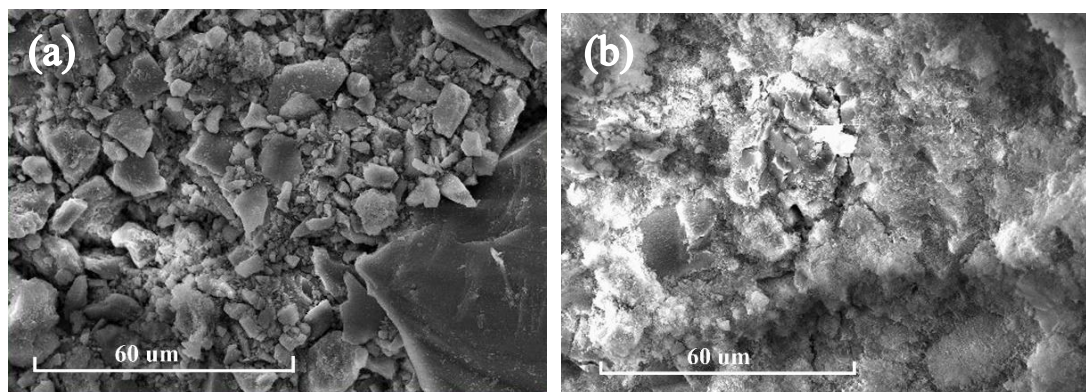

**Figure S1.** Images of EDS detected area of (a) the stone powder and (b) aerated brick.

**Table S1.** Elemental composition of the sample in Figure S1 (a).

| Element | Weight% | Atomic% |
|---------|---------|---------|
| O       | 48.07   | 63.34   |
| Na      | 1.71    | 1.57    |
| Al      | 5.31    | 4.15    |
| Si      | 33.27   | 24.97   |
| K       | 2.69    | 1.45    |
| Ca      | 7.70    | 4.05    |
| Fe      | 1.26    | 0.47    |
| Totals  | 100.00  |         |

Note: Carbon (C) was removed in this table because of the interference from the Carbon paste.

**Table S2.** Elemental composition of the sample in Figure S1 (b).

| Element | Weight% | Atomic% |
|---------|---------|---------|
| O       | 47.48   | 63.62   |
| Na      | 1.79    | 1.67    |
| Al      | 5.18    | 4.11    |
| Si      | 27.17   | 20.74   |
| K       | 2.45    | 1.34    |
| Ca      | 15.94   | 8.52    |
| Totals  | 100.00  |         |

Note: Carbon (C) was removed in this table because of the interference from the Carbon paste.

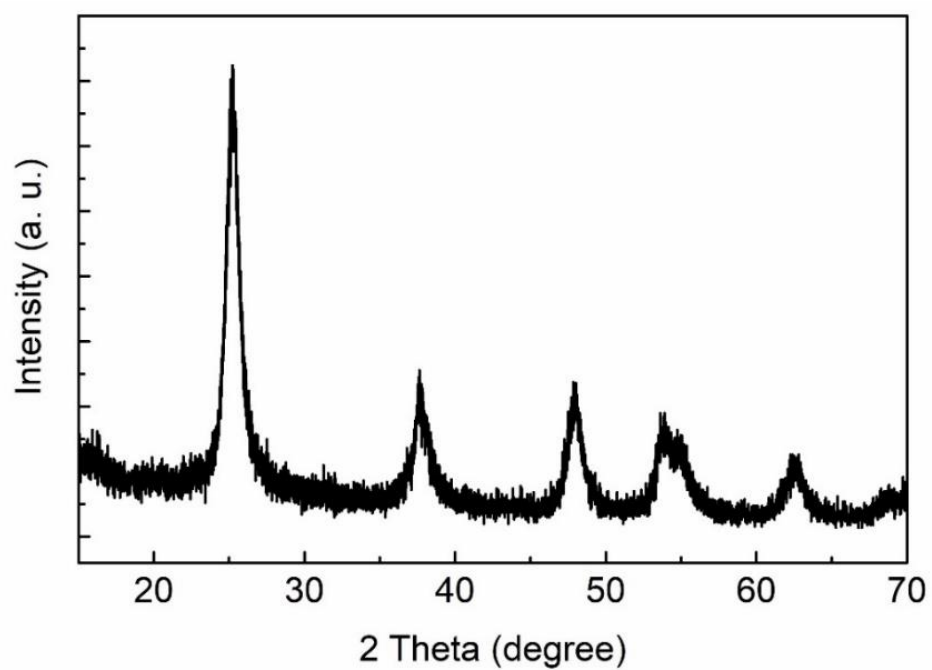

**Figure S2.** XRD pattern of TiO<sub>2</sub> nanoparticles.

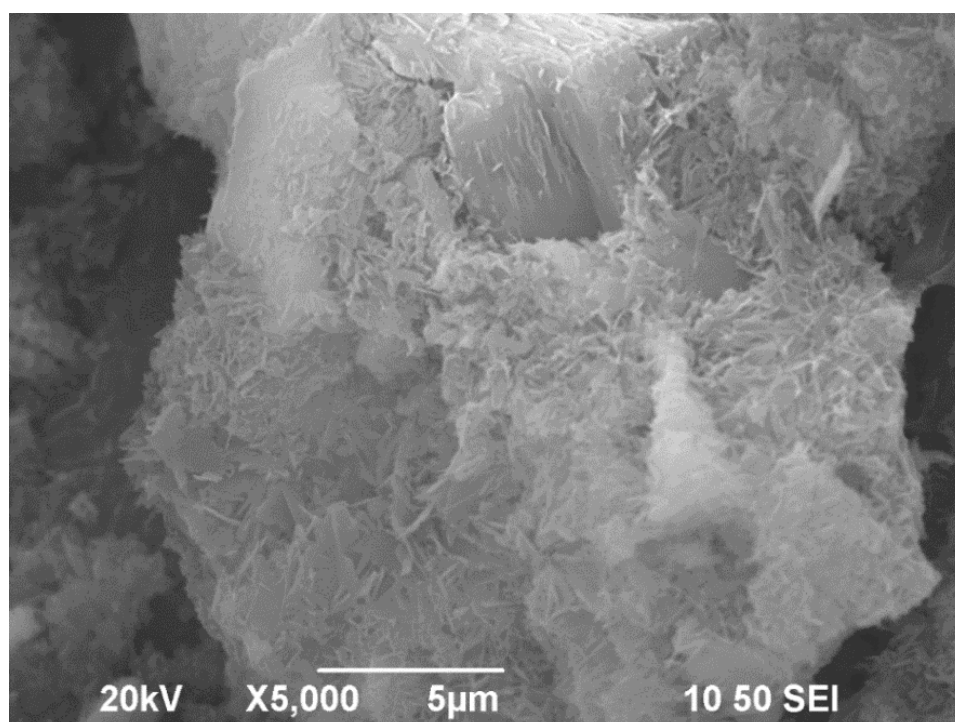

**Figure S3.** SEM image of the aerated brick surface with modification.
